# Supplementary material for: In Vivo and In Silico Analgesic Activity of Ficus populifolia Extract Containing 2-O-β-D-(3′,4′,6′-Tri-acetyl)-glucopyranosyl-3-methyl Pentanoic Acid
Source: MDPI journal article supplement (doi:10.3390/ijms24032270), 2023-01-23
Supplement: s1 [file s1]

DEPT 135  
Cl-dept135-bbo CDCl3 d: mmjabal 1

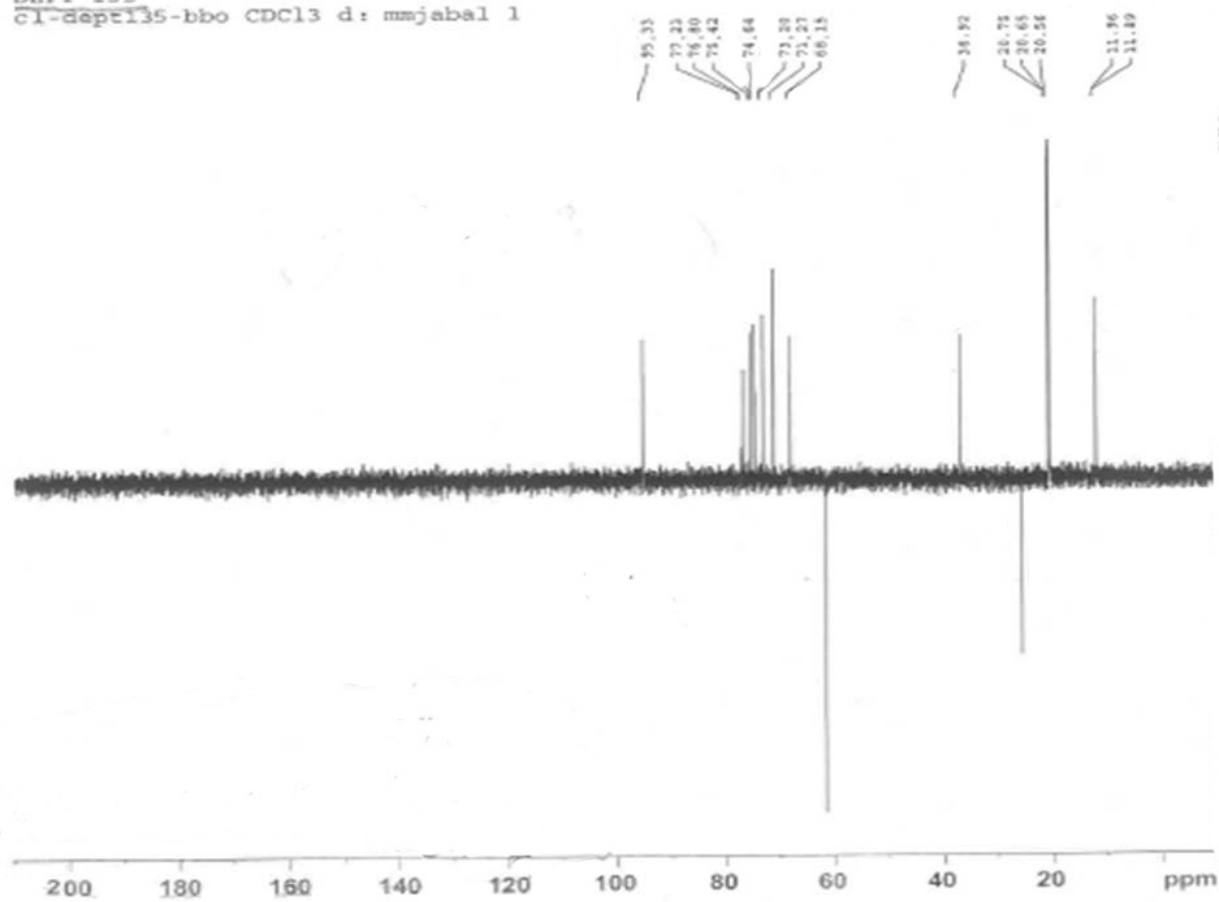

Figure S2. DEPT-135 spectrum of compound 4.

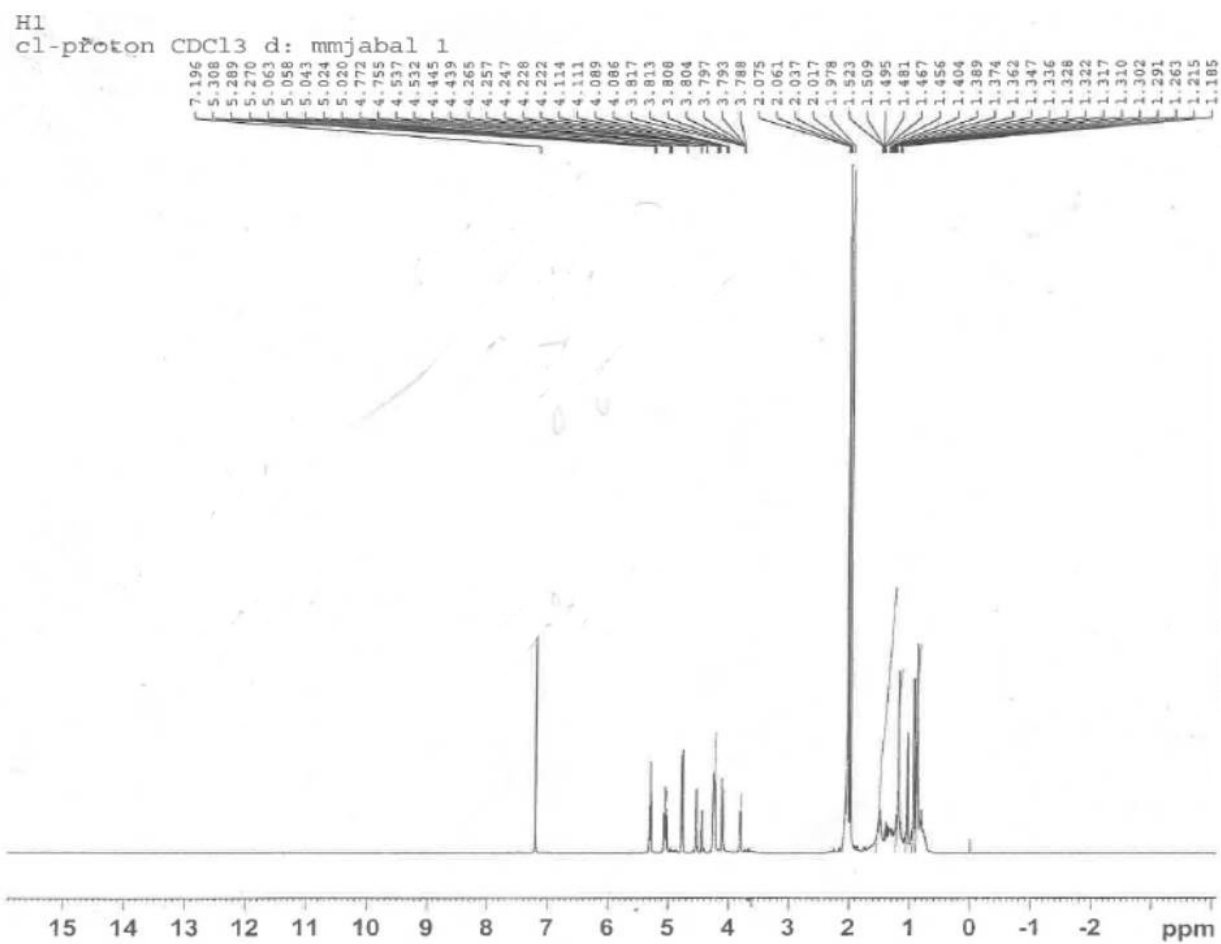

Figure S3.  $^1\text{H}$ -NMR spectrum of Compound 4.

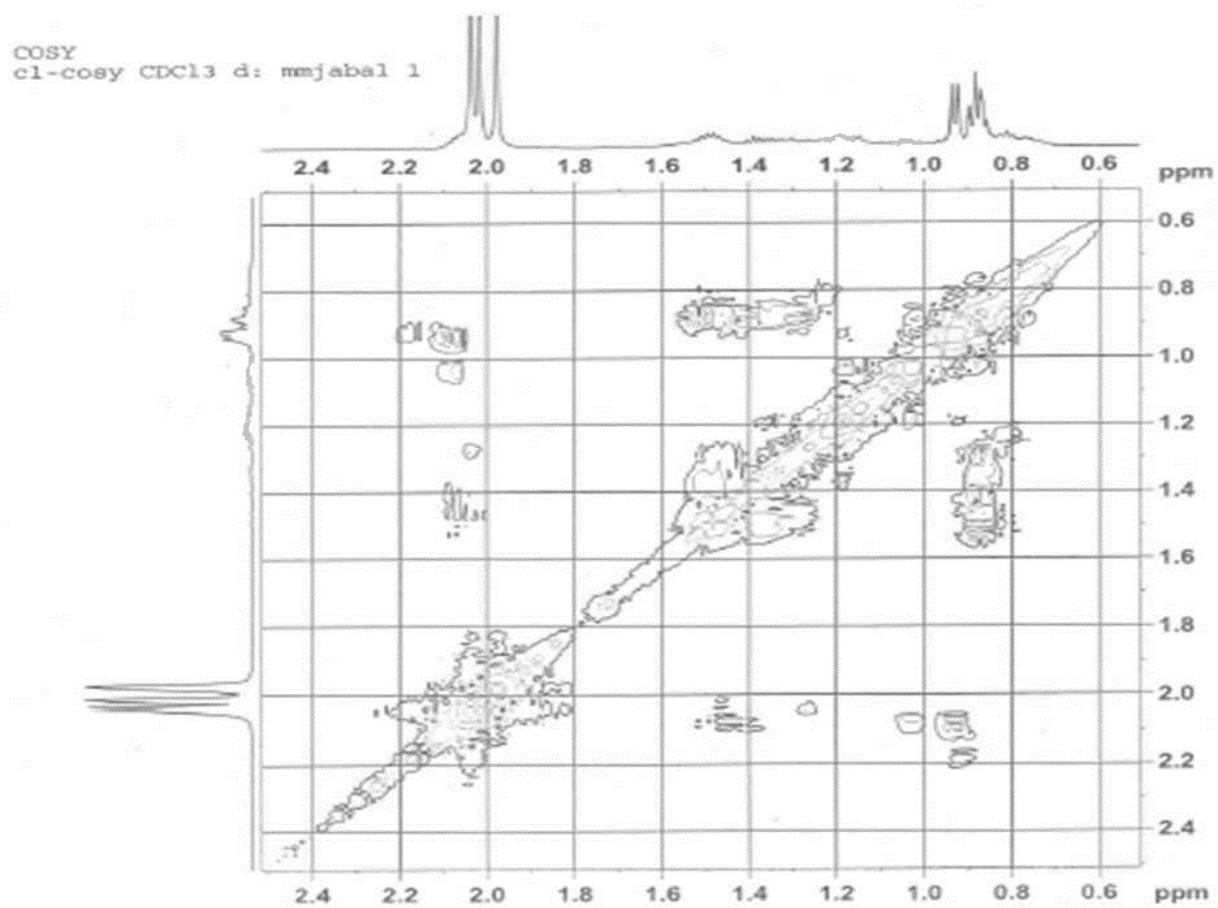

Figure S4. H-H COSY spectrum of compound 4.



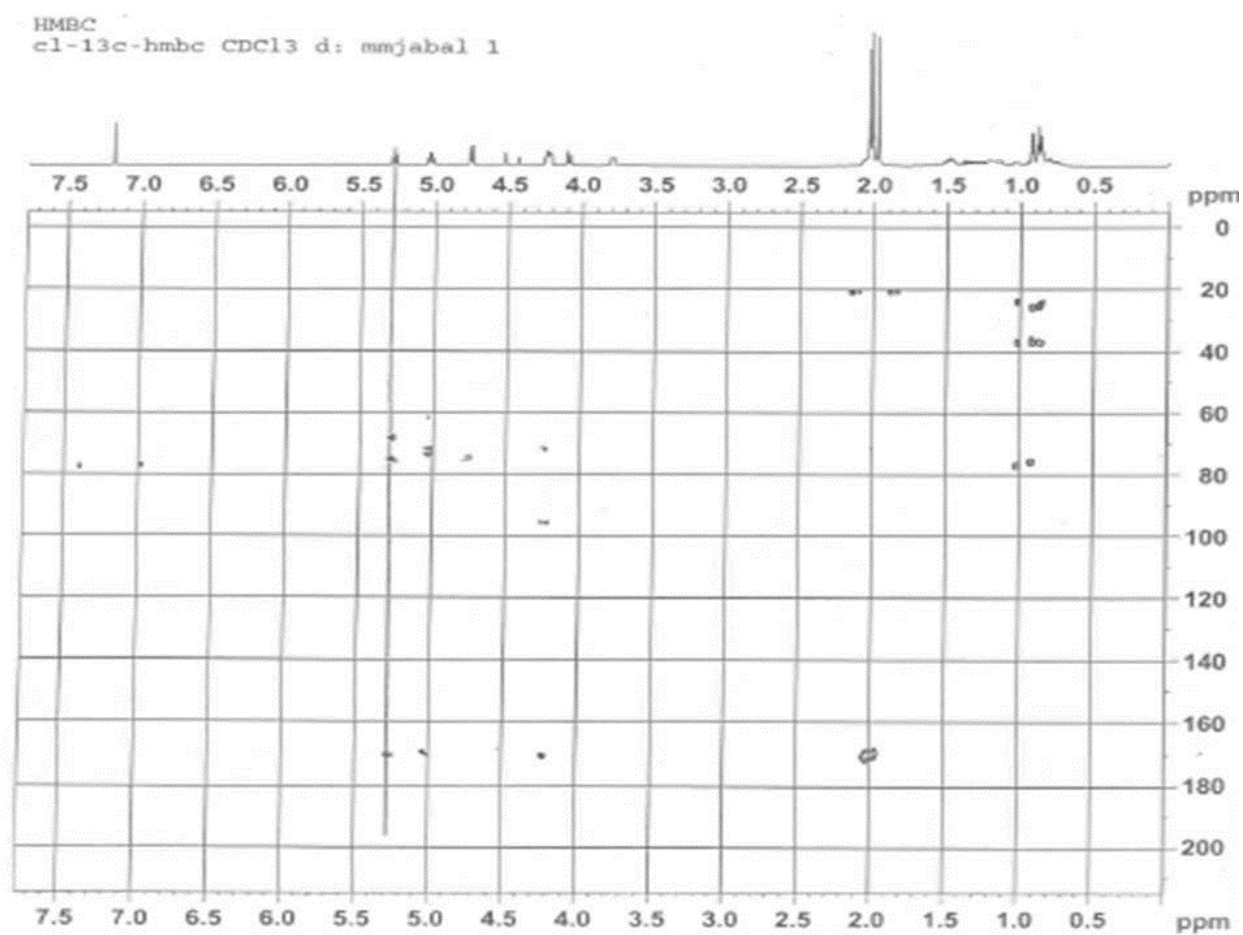

Figure S6. HMBC spectrum of compound 4.
